# Supplementary material for: X-ray structure and characterization of a probiotic Lactobacillus rhamnosus Probio-M9 L-rhamnose isomerase
Source: Springer Nature journal article supplement (doi:10.1007/s00253-024-13075-9), 2024-03-02
Supplement: MOESM1 [file 253_2024_13075_MOESM1_ESM.pdf]

## Supplemental Information

### **X-ray structure and characterization of a probiotic *Lactobacillus rhamnosus* Probio-M9 L-rhamnose isomerase**

Hiromi Yoshida<sup>1,2\*</sup>, Naho Yamamoto<sup>3</sup>, Lin Hai Kurahara<sup>4</sup>, Ken Izumori<sup>2,3</sup>, Akihida Yoshihara<sup>2,3</sup>

ATGGTAAAACCTGAAGAGGTGGACAAAGCGTATGAAGTGGCCAAACAGCGCTACGCAGA  
GATTGGAGTCGACACTGATGCAGCCATGAAAGAATTAGAGAAAGTACCGCTGAGTGTGCA  
TTGTTGGCAAGGCGACGATATTCACGGTTTTCTGTTCCGAATCAGGAATTAACAGGCGGC  
ATTGGGGTGTCTCAGGCAACTATCCGGGCATTGCTCGTACTCCGGATGAATTAGCCGGTGATA  
TGCACGAAGCACTCTCTCTGATCCCCGGTAAGCATCGCGTTCAGCTGCATGCGATTTATGC  
CGTAACCGACAAGAAACGCGATTTGGACACCCTGGAACCGGAAGATTTCTGACTACTGGAT  
CGATTGGGCTAAACAGGAAGGAGTTGGCTTGGATTTTAACGGTACCTTCTTTTCGCATCCG  
ATGGTGAAAGATAACATGACGGTCAGCTCTCCGGATCCCAAAGTCCGCGACTTTTGGATTC  
GGCACGGCAAAATCTCTCGCGAAATTAGCAATTACATCGGTGAGAACTGGGCAGCCAAG  
TCGTGAATAACTTTTGGCTTCCTGATGGCTTCAAAGACAACCCGATCGATAAGAAAACCCC  
TCGCTTGCGCTTACTGAAAGCCCTCGATGAAATCATCAAAGACCCACTCCCCGAGAAGAA  
CACCATTGAGAGCTTTGAAGGGAACTGTTTGGTACAGGCATTGAATCGTATAACCACCGG  
AAGTCACGAATTCTACCAGAATTACGCGATTTCCCGCAACAAGCTGTGGACGATTGATGCG  
GGTCATTTTCATCCGACCGAAGATGTGTCCGATAAATTTAGCGCTTTCTTCCCGTTCGGTAA  
AGGGCTGTTTATGCACGTGTCCCGTCCAGTACGTTGGGACTCAGATCATGTCTGTGATCATG  
GATGATGCGCTTATCCGCATTACGCGTAGCCTGGTTCGTGATGGCTATCTGGATCGGACGCA  
TATTGGCCTGGATTTCTTTGACGCGACGATCAATCGTGTTGCGGCTTGGGTTGTTGGTGCC  
CGTGCCACACAGAAAAGTCTGCTTCAAGCAATGCTGGCGCCAATTGACCAACTGAAGAA  
AGATGAACTCAATGCGGATTTACCACTCGCCTGATCGAAACGGAGGAATTGAAATCGTT  
CCCGTTTGGTGCAGTCTGGGACAAATTTTGCCAAGATCACAATACTCCAGTGGGGTTCTGA  
CTGGATGAACAACATTCATCAGTATGAGAAAGACGTTTAAACGTGATGCAAAGCT  
GGTGCAC

**Supplemental Fig. S1 Nucleotide sequence of synthesized gene of LrL-RhI**

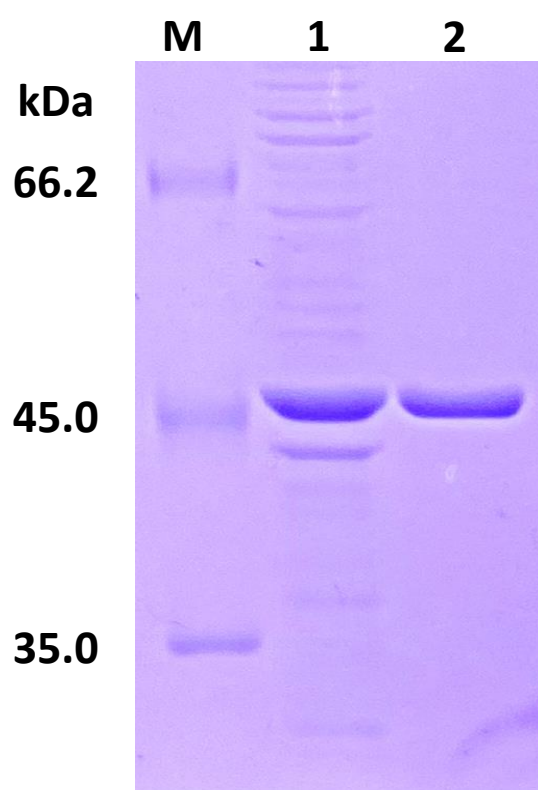

M : Protein marker  
 1 : Crude enzyme  
 2 : Purified enzyme

**Supplemental Fig. S2 SDS-PAGE analysis of purification of recombinant LrL-RhI.**  
 The samples of the crude enzyme (lane1) and purified enzyme (lane2) are shown with protein markers.

#### Purification of LrL-RhI

|                 | Total protein<br>(mg) | Total activity<br>(U) | Specific activity<br>(U/mg) | Purification<br>fold | Yield (%) |
|-----------------|-----------------------|-----------------------|-----------------------------|----------------------|-----------|
| Crude enzyme    | 280                   | 55.8                  | 0.199                       | 1.00                 | 100       |
| Purified enzyme | 7.79                  | 9.09                  | 1.17                        | 5.85                 | 16.3      |

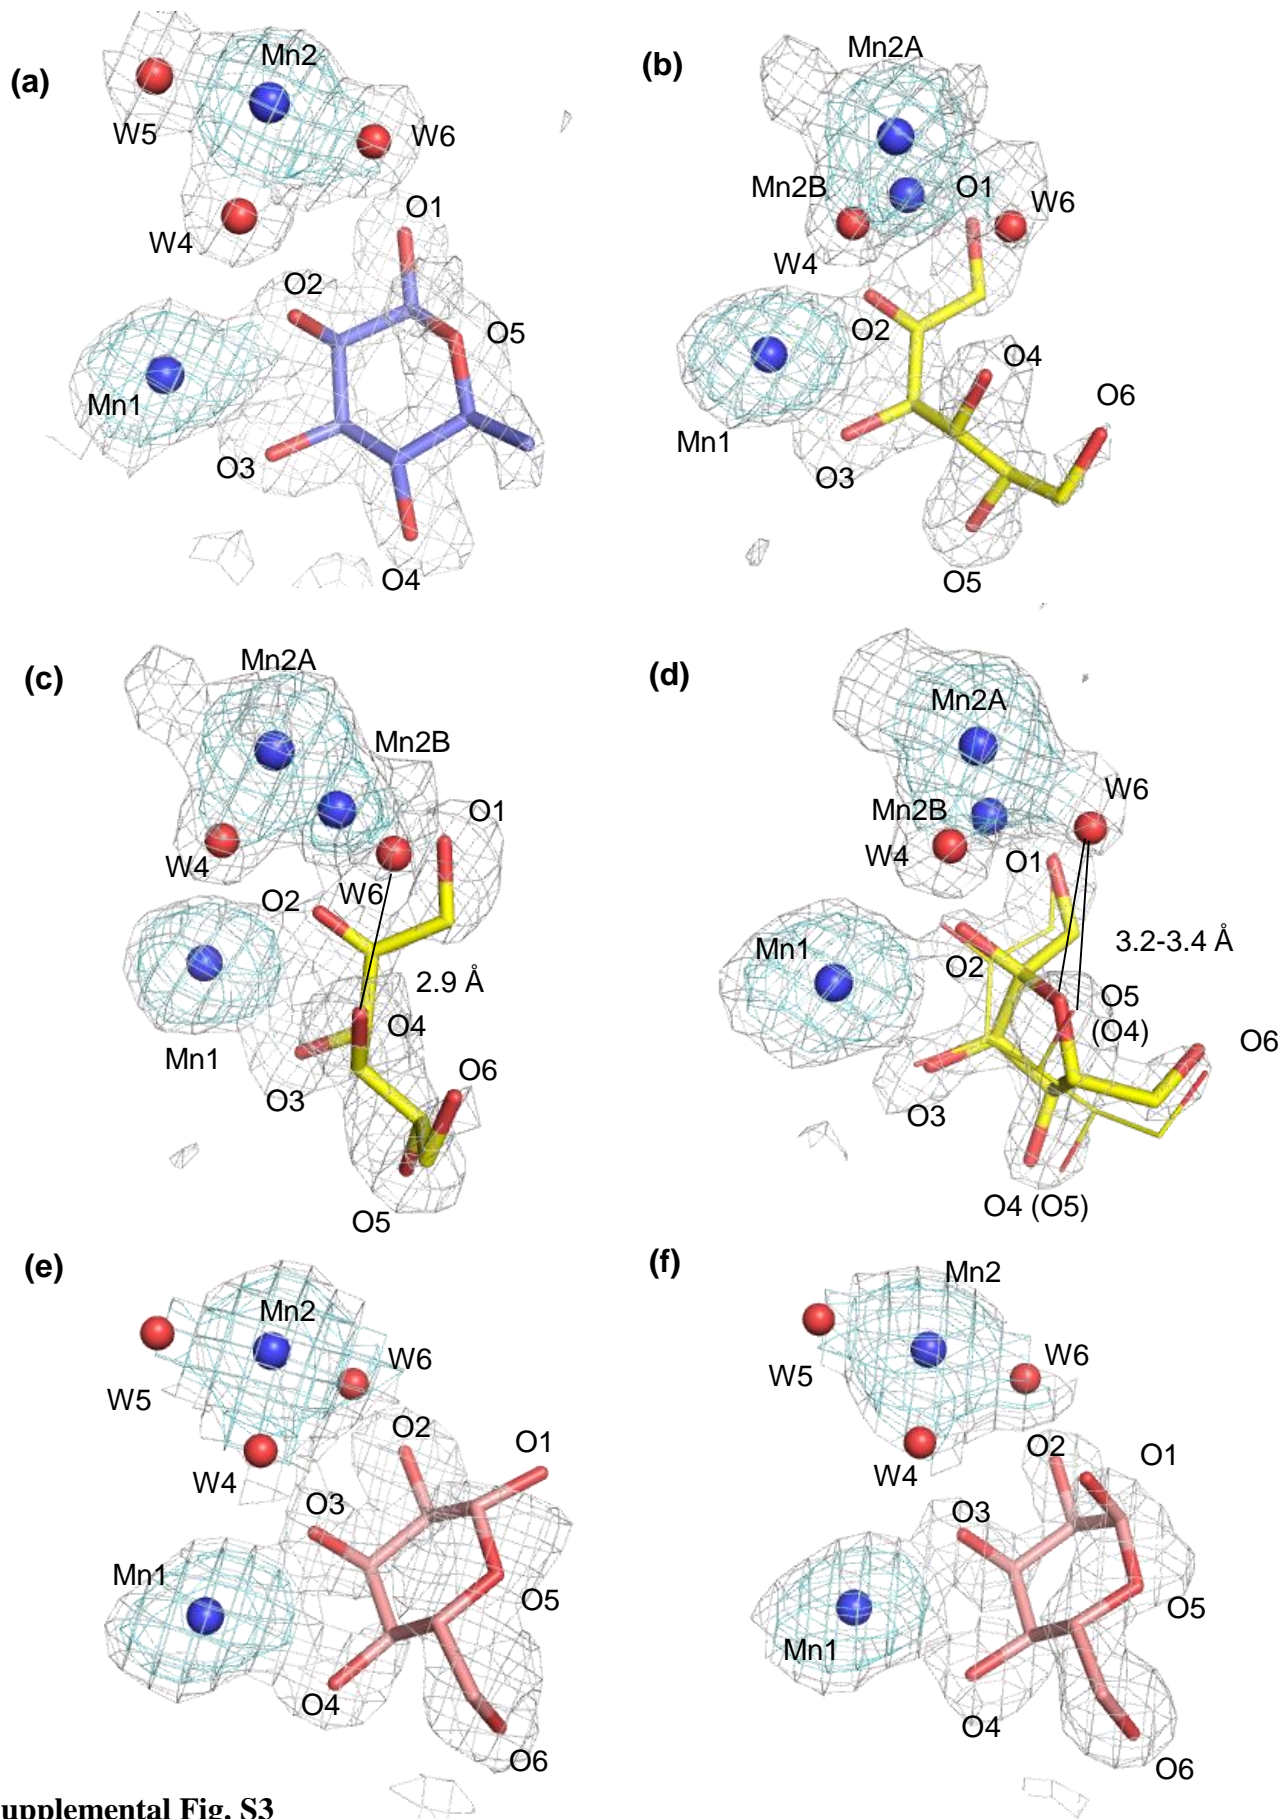

### Supplemental Fig. S3

Metal ions, water molecules, and bound substrate with simulated annealing omit maps.

(a) LrL-RhI/L-rhamnose (Mol-B) with sa-omit maps at contour level 5.0 (cyan) and 3.0 (gray). (b, c) LrL-RhI/D-allulose (Mol-B) and (d) LrL-RhI/D-allulose (Mol-C) with sa-omit maps at contour level 5.0 (cyan) and 3.0 (gray). (e) LrL-RhI/D-allose (Mol-B) and (f) LrL-RhI/D-allose (Mol-D) with sa-omit maps at contour levels 5.0 (cyan) and 2.5 (gray).

(a)

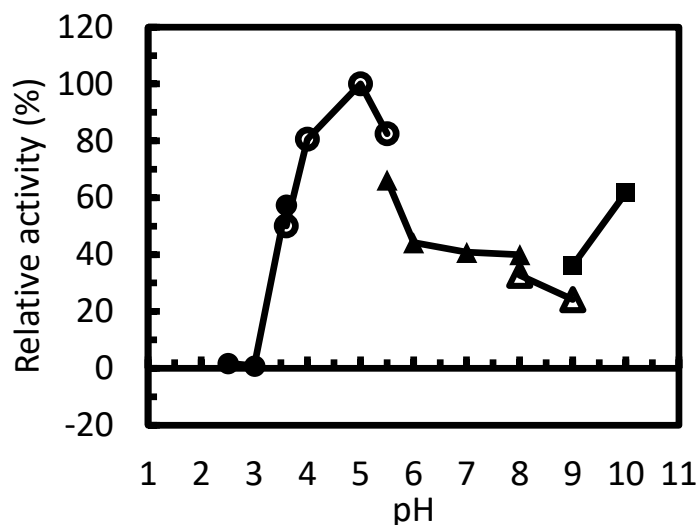

- Glycine-HCl (pH 2.5~3.6)
- Acetate (pH 3.6~5.5)
- ▲ Sodium phosphate (pH 5.5~8.0)
- △ Tris-HCl (pH 8.0~9.0)
- Glycine-NaOH (pH 9.0~10.0)

(b)

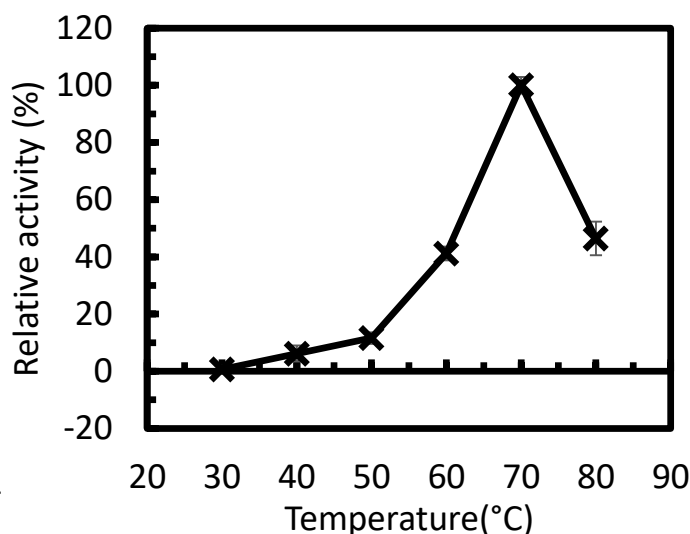

(c)

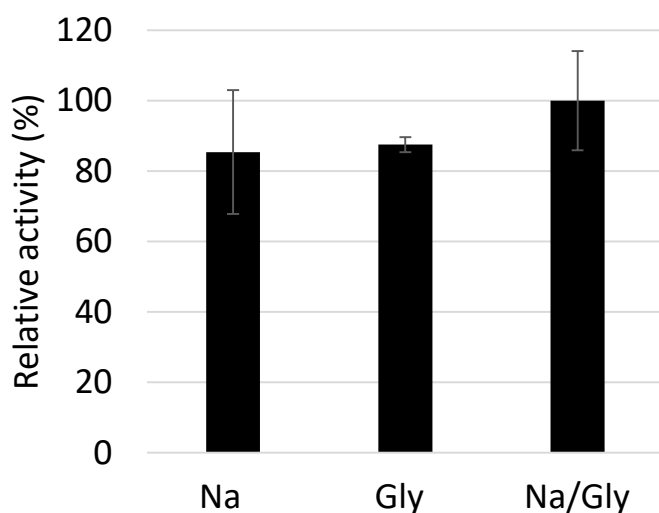

Na: Sodium phosphate buffer (pH 7.0)

Gly: Glycine-HCl buffer (pH 3.6)

Na/Gly: Sodium phosphate buffer including glycine (pH 7.0)

#### Supplemental Fig. S4 Enzyme properties of recombinant LrL-RhI in the presence of $\text{CoCl}_2$ .

Effects of (a) pH on the enzyme activity, (b) temperature on the enzyme activity, and (c) additional glycine on the enzyme stability in the presence of  $\text{CoCl}_2$ .

To investigate the effects of pH (a), enzyme activity was measured using the following buffers: glycine-HCl buffer (pH 2.5–3.6, circles), acetate buffer (pH 3.6–5.5, open circles), sodium phosphate buffer (pH 5.5–8.0, triangles), Tris-HCl buffer (pH 8.0–9.0, open triangles), and glycine-NaOH buffer (pH 9.0–10.0, squares). The optimum pH was shown between 4.5 and 5.5. To investigate the effect of temperature (b), enzyme activity was measured after incubation at each temperature for 10 min using a sodium phosphate buffer (pH 5.5). The highest enzyme activity was observed at 70 °C, which is the same as shown in the presence of  $\text{MnCl}_2$ . To investigate the effect of glycine for stability (c), the enzyme was incubated at 4 °C for 24 hours in a 20 mM sodium phosphate buffer (pH 7.0), a 20 mM glycine-HCl (pH 3.6), and a 20 mM sodium phosphate buffer including 20 mM glycine (pH 7.0). The remaining activity was measured using a sodium phosphate buffer (pH 5.5), containing 5 mM L-rhamnose and 1 mM  $\text{CoCl}_2$ , and the relative activity was determined. Slightly higher activity was shown in the sodium phosphate/glycine buffer. Each measurement was performed in triplicate.



**(a)****Asp46-Thr73**

(missing 53-64)

Mol A

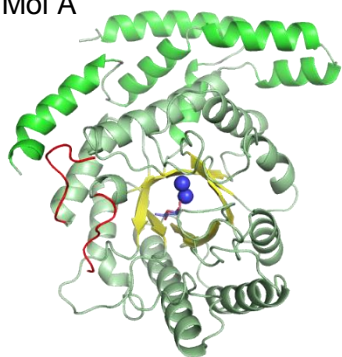**Asp51-Arg78**

Mol A

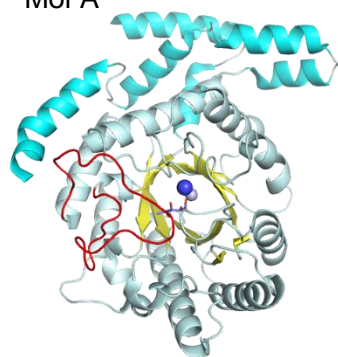**Asp42-Thr68**

(missing 49-61)

Mol A

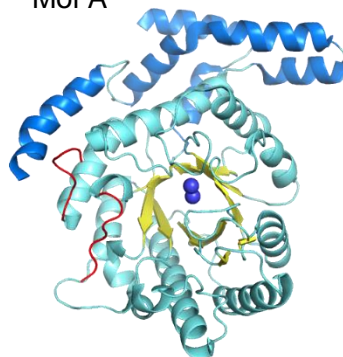**Gly60-Arg76**

Mol A

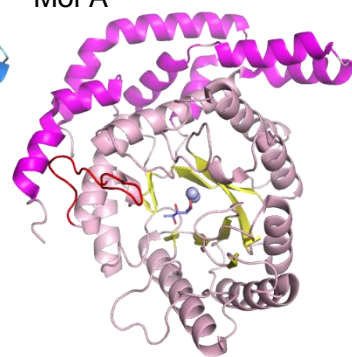**LrL-Rhl/rham****(*Lactobacillus rhamnosus*)**

Theoretical pI: 5.47

426 a.a.

(Asp + Glu): 67 (15.7%)

(Arg + Lys): 51 (12.0%)

**EcL-Rhl/rham****(*Escherichia coli*)**

(PDB:1DE6)

Theoretical pI: 5.48

419 a.a.

(Asp + Glu): 59 (14.1 %)

(Arg + Lys): 44 (10.5%)

**BhL-Rhl****(*Bacillus halodurans*)**

(PDB:3UU0)

Theoretical pI: 5.58

418 a.a.

(Asp + Glu): 68 (16.3 %)

(Arg + Lys): 53 (12.7%)

**PsL-Rhl/rham****(*Pseudomonas stutzeri*)**

(PDB:2I56)

Theoretical pI: 5.72

430 a.a.

(Asp + Glu): 56 (13.0 %)

(Arg + Lys): 47 (10.9%)

**(b)**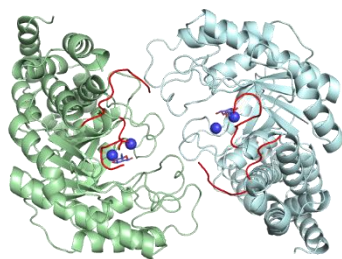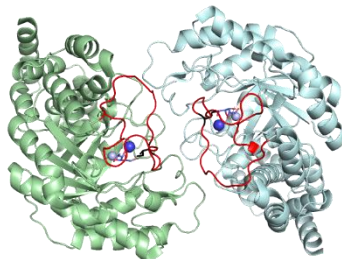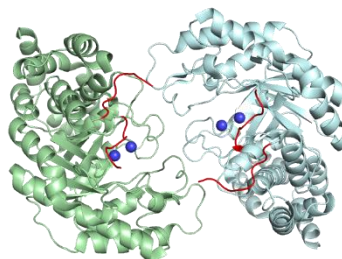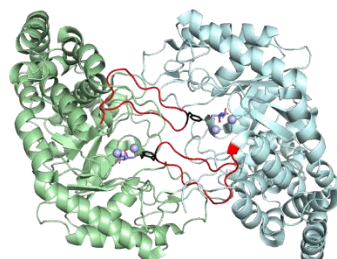**(c)**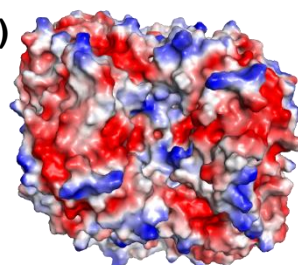**LrL-Rhl/rham**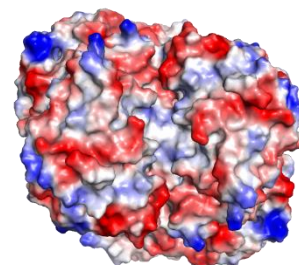**EcL-Rhl/rham**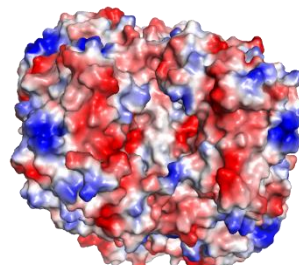**BhL-Rhl**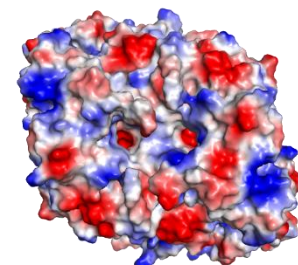**PsL-Rhl/rham**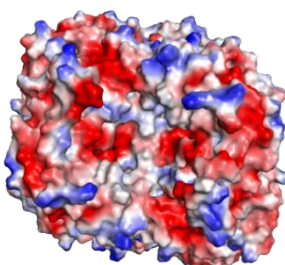**LrL-Rhl/rham\_del**

Deletion of Asp46-Thr73

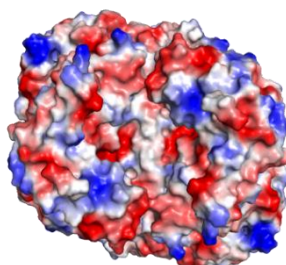**EcL-Rhl/rham\_del**

Deletion of Asp51-Arg78

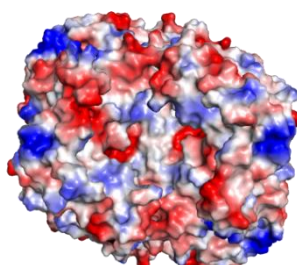**BhL-Rhl\_del**

Deletion of Asp42-Thr68

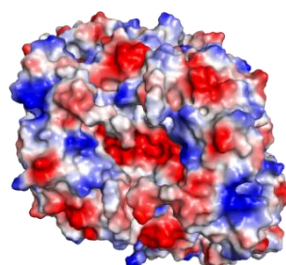**PsL-Rhl/rham\_del**

Deletion of Gly60-Arg76

**Supplemental Fig. S5**

Comparison of monomer and dimer interfaces of L-RhIs. The flexible loop regions are colored red.

The view of the surface model with electrostatics of L-RhIs is shown with positively and negatively charged areas, which are colored blue and red, respectively. In LrL-Rhl, negatively charged areas are concentrated toward the active site. It may be a reason why the optimum pH for the activity of LrL-Rhl is acidic.

(a)

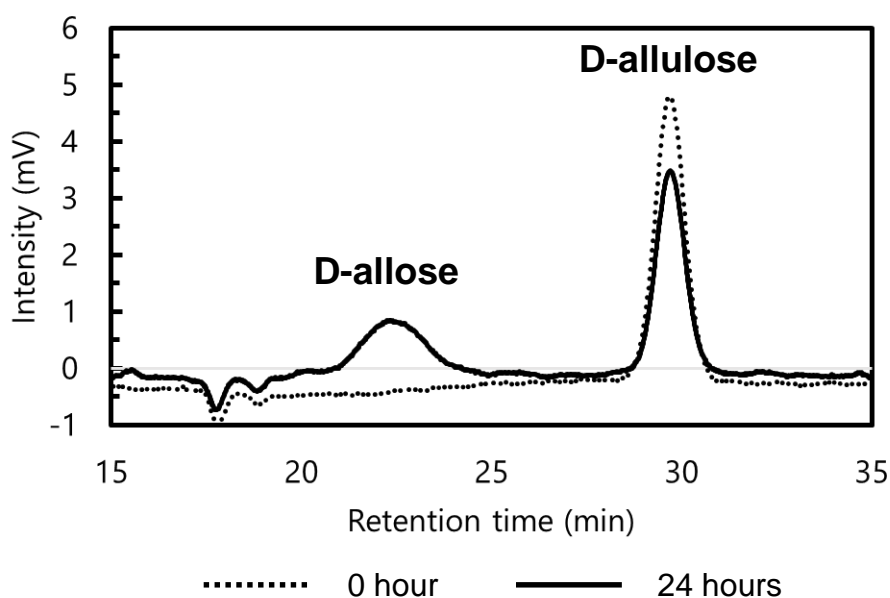

(b)

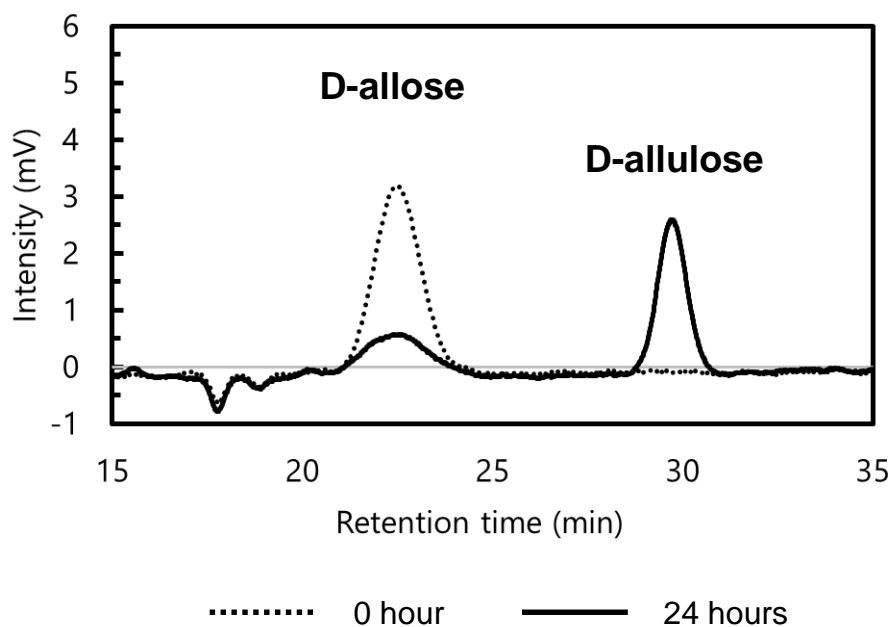

### Supplemental Fig. S6

HPLC analysis of the production of D-allose and D-allulose by LrL-RhI.

(a) D-allose production from D-allulose and (b) D-allulose production from D-allose.

Purified LrL-RhI was reacted for 24 hours in a 35 mM sodium phosphate buffer (pH 5.5) containing 1 mM  $\text{CoCl}_2$  and 5 mM substrate ((a) D-allulose or (b) D-allose). For HPLC analysis, a Shimadzu RID-20A refractive index detector and a Hitachi HPLC column GL-C611 were used. Separation was performed at 60°C using 0.1 mM NaOH as an eluent at a flow rate of 1.0 mL/min. The results of the HPLC analysis are shown with a solid line (24 hours) and a dotted line (0 hour). The retention times of D-allose and D-allulose are 22.5 and 29.7 min, respectively.
